# Supplementary material for: Impact of model assumptions on demographic inferences: the case study of two sympatric mouse lemurs in northwestern Madagascar
Source: PubMed Central journal article supplement (PMC8561976; doi:10.1186/s12862-021-01929-z), 2021-11-02
Supplement: 12862_2021_1929_MOESM1_ESM.pdf [file 12862_2021_1929_MOESM1_ESM.pdf]

Additional file 1 for

**Impact of model assumptions on demographic inferences: the case study of two sympatric mouse lemurs in northwestern Madagascar**

Helena Teixeira<sup>1\*</sup>, Jordi Salmons<sup>2</sup>, Armando Arredondo<sup>3,4</sup>, Beatriz Mourato<sup>3</sup>, Sophie Manzi<sup>2</sup>, Romule Rakotondravony<sup>5,6</sup>, Olivier Mazet<sup>4</sup>, Lounès Chikhi<sup>2,3</sup>, Julia Metzger<sup>7,8</sup>, Ute Radespiel<sup>1\*</sup>

<sup>1</sup> Institute of Zoology, University of Veterinary Medicine Hannover, Foundation, Bünteweg 17, Hannover, 30559, Germany

<sup>2</sup> Laboratoire Évolution & Diversité Biologique (EDB UMR 5174), Université de Toulouse Midi-Pyrénées, CNRS, IRD, UPS. 118 route de Narbonne, Bât. 4R1, 31062 Toulouse cedex 9, France

<sup>3</sup> Instituto Gulbenkian de Ciência, Rua da Quinta Grande, 6, P-2780-156 Oeiras, Portugal

<sup>4</sup> Université de Toulouse, Institut National des Sciences Appliquées, Institut de Mathématiques de Toulouse, Toulouse, France

<sup>5</sup> Ecole Doctorale Ecosystèmes Naturels (EDEN), University of Mahajanga, 5 Rue Georges V - Immeuble KAKAL, Mahajanga Be, B.P. 652, Mahajanga 401, Madagascar

<sup>6</sup> Faculté des Sciences, de Technologies et de l'Environnement, University of Mahajanga, 5 Rue Georges V - Immeuble KAKAL, Mahajanga Be, B.P. 652, Mahajanga 401, Madagascar

<sup>7</sup> Institute of Animal Breeding and Genetics, University of Veterinary Medicine Hannover, Foundation, Bünteweg 17p, Hannover, 30559, Germany

<sup>8</sup> Veterinary Functional Genomics, Max Planck Institute for Molecular Genetics, Ihnestrasse 73, 14195 Berlin, Germany

### **Text S1 – RADseq sequencing library**

An average of  $8,192,559 \pm 4,288,959$  (SD; standard deviation) and  $11,635,382 \pm 11,450,501$  Illumina reads per individual were obtained for the 22 *M. murinus* and 56 *M. ravelobensis*, respectively. After applying the quality filters (i.e., removing Illumina barcodes, discarding low quality reads and trimming), an average of  $7,084,098 \pm 3,728,286$  and  $7,794,014 \pm 3,338,758$  reads per individual were retained for *M. murinus* and *M. ravelobensis*, respectively. Of these, an average of  $6,660,529 \pm 3,521,900$  *M. murinus* reads and  $7,411,684 \pm 3,179,920$  *M. ravelobensis* reads per individual were successfully mapped to the reference genome. After PCR duplicate removal, an average of  $5,197,520 \pm 2,508,055$  and  $5,818,960 \pm 2,293,164$  reads per individual were finally retained for the downstream analyses for *M. murinus* and *M. ravelobensis*, respectively (Table S9 and S10).

### **Text S2 – Whole-genome sequences sequencing library**

Whole-genome sequencing and mapping of the single *M. murinus* and the two *M. ravelobensis* individuals resulted in 39,087,552,633 bp (cigar; *M. murinus*), 41,577,088,467 bp (cigar; *M. ravelobensis*, Ravelobe) and 45,840,222,542 bp (cigar; *M. ravelobensis*, Ankomakoma) mapped to the *M. murinus* reference genome (2439.73 Mb), and a corresponding error rate of  $2.66 \times 10^{-02}$ ,  $3.64 \times 10^{-02}$  and  $3.40 \times 10^{-02}$ , respectively.

### **Text S3 – Relatedness results**

The relatedness analyses revealed that two *M. murinus* individuals sampled in Ankomakoma, and two *M. ravelobensis* individuals captured in each sampling site had first degree relatives (i.e., parent/offspring or full sibling) in our dataset ( $n = 6$ ; data not shown). One of each closely related dyad partners was removed from the dataset and no longer considered in the downstream population genomics analyses. Therefore, the final dataset for the remaining analyses comprised 22 *M. murinus* (7 from Ravelobe and 15 from Ankomakoma) and 56 *M. ravelobensis* (31 from Ravelobe and 25 from Ankomakoma).

### **Text S4 – Genomic diversity in *M. murinus* and *M. ravelobensis***

Population-genomic diversity in each study site was estimated based on the percentage of polymorphic sites, unbiased expected heterozygosity ( $H_e$ ; estimated according to [1]) observed

heterozygosity ( $H_o$ ) and inbreeding coefficients ( $F_{IS}$ ). All genetic summary statistics were calculated with ARLEQUIN [2] after conversion of the Variant Call Format (VCF) file from dataset 2 into the ARLEQUIN format using PGDSpider [3].

Despite being represented by a smaller sample, *M. murinus* exhibited consistently higher levels of genomic diversity than *M. ravelobensis* in each forest site (Table S5). The observed heterozygosity ranged between 0.220 (*M. ravelobensis*, Ravelobe) and 0.364 (*M. murinus*, Ravelobe). Both species showed non-significant negative  $F_{IS}$  values ranging from -0.069 to -0.203 ( $P > 0.05$ ), suggesting no systematic departures from Hardy-Weinberg Equilibrium (HWE).

The genomic diversity statistics estimated for *M. murinus* and *M. ravelobensis* (Table S5) were lower than previous values estimated with microsatellites datasets [4–6], but comparable to those reported for other primate species based on a RADseq dataset (e.g.,  $H_o = 0.3475$  and 0.3148 for *Rhinopithecus roxellana* populations) [7], and even higher than for some other taxa (e.g., [8–10]). A slightly higher observed heterozygosity than expected under HWE coupled with the non-significant but negative population inbreeding coefficients suggest that populations were large enough to retain genetic diversity [5, 11], or that outside individuals were regularly immigrating into the two forest sites.

#### **Text S5 – Impact of the minimum read depth in the *PSMC* analyses**

The *PSMC* runs considering different minimum read depth options (–d1 to –d12) resulted in similar demographic curves for *M. ravelobensis* (Ankomakoma; Figure S9). When decreasing the –d option from twelve to one, the genome-wide coverage only decreased from 18.79X to 18.2X, suggesting that the sites considered in the *PSMC* analyses were of good quality. Moreover, the two *M. ravelobensis* sequences suggested a similar demographic history for Ankomakoma and Ravelobe, despite the mean genome-wide coverage differences (18.79 and 17.04, respectively). These results suggest that our *PSMC* inferences are likely not strongly biased by a mean genome-wide coverage below 18X.





Similarly to *M. murinus*, the ms command specifies that *M. ravelobensis* was structured in a n-island model of migration with a constant population size over the time and underwent five major changes in population connectivity. The demographic parameters were specified by the following command options:

-l (number of islands) = 61

-m = 2.42; 0.65; 1.97; 5.39; 86.38; 9.26 (backwards in time)

-t = 7.9; 20.1; 27.1; 135.6; 338.9 kyr, when considering  $N_0 \sim 412$  and a generation time of 2.5 years.

### **Text S7 – Impact of repeat regions in the demographic modelling**

To evaluate the impact of repeat regions in our demographic inferences, we reran the *Stairway Plot* for the entire *M. ravelobensis* dataset ( $n = 55$ ) and the *PSMC* analyses for the three whole-genome sequences without the repeat regions. None of the new results showed substantial deviations from previous results generated using the full dataset and included in the main text (Figure 3a,b). The *PSMC* analyses without the repeat regions (Figure S10a) exhibited a similar demographic trend for *M. murinus* as the analyses using the full dataset (Figure 3a). The *PSMC* dynamics with and without the repeat regions for *M. ravelobensis* were also similar, except for the population bottleneck that occurred during the African Humid Period. This event was no longer detected when considering the dataset without repeat regions. Such differences are likely related to the substantial reduction on the number of informative sites after removal of the repeat regions (approximately 52%). Since the *Stairway plot* results without the repeat regions (Figure S10b) revealed an identical curve to the one inferred using all the sites (Figure 3b), we conclude that the demographic inferences for our study species were not impacted by the inclusion of repeat regions.

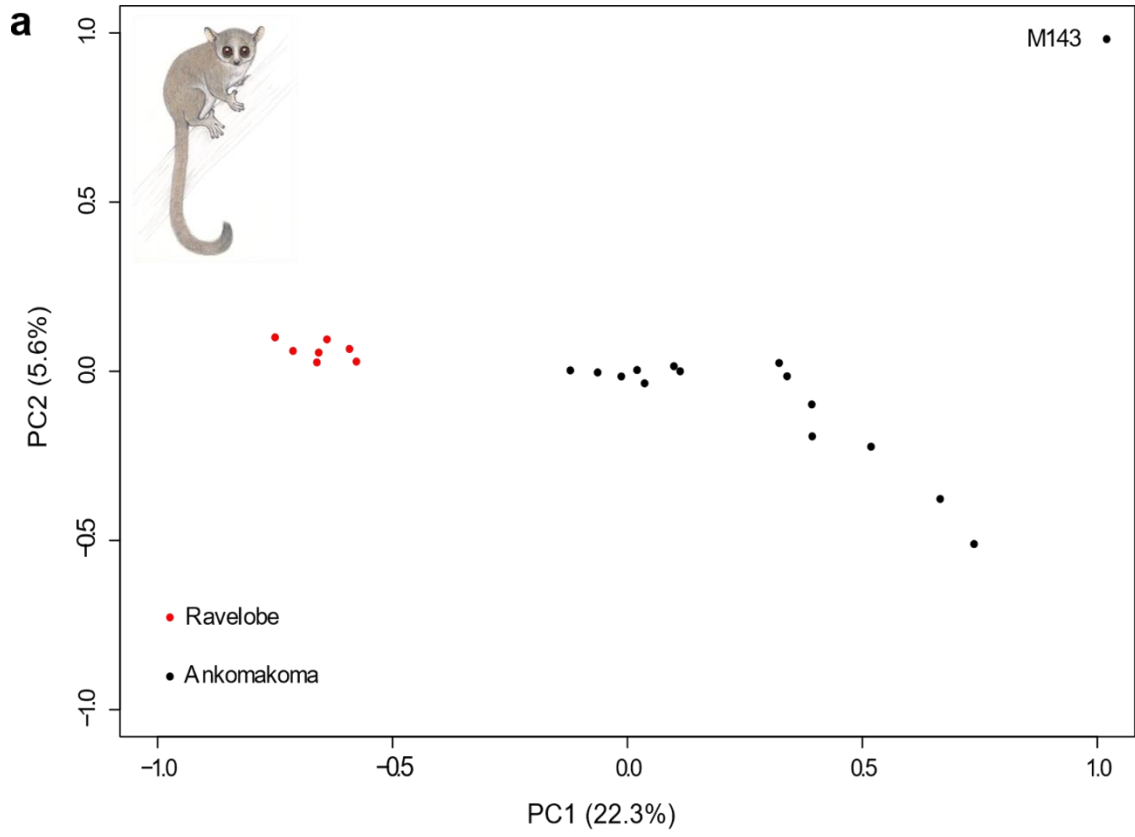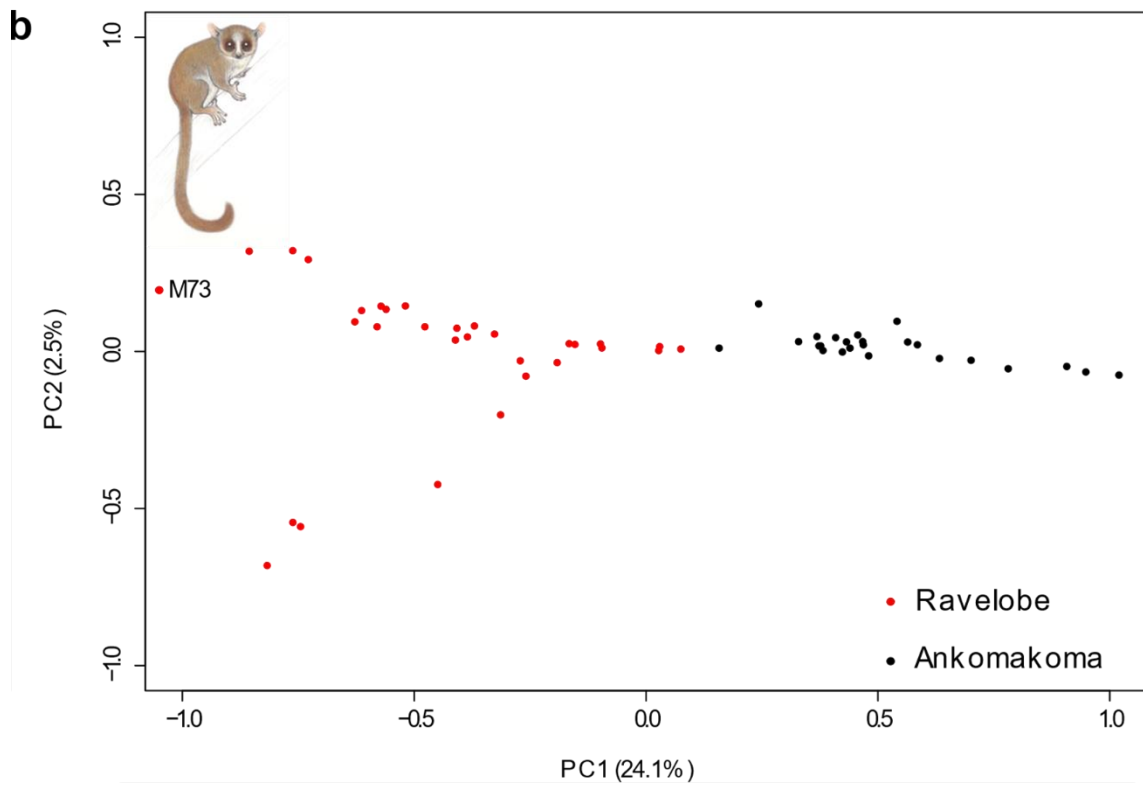

**Figure S1.** Principal Component Analyses plots based on genotype likelihoods in **a** *M. murinus* (N = 22) and **b** *M. ravelobensis* (N = 56) using the same datasets as for the clustering analyses. The axis labels show the variation explained by the first two principal components (PC1 and PC2). Results suggest weak genetic structure among the two sampling sites for both species. Although the PCA analyses revealed one genetically distinct *M. murinus* individual (M143), this animal was kept in our analyses, because no differences were observed in the clustering analyses (Figure 2 and Figure S2), the inbreeding coefficient suggested no departure from Hardy-Weinberg Equilibrium (HWE; Table S6), and the sample showed a good individual mean coverage depth (Table S2). In contrast, *M. ravelobensis* individual M73 was excluded from our subsequent analyses because it exhibited an  $F = -0.476$  (Table S6), strongly deviating from HWE, which may impact downstream analyses. Animal illustrations copyright 2013 Stephen D. Nash / IUCN SSC Primate Specialist Group. Used with permission.



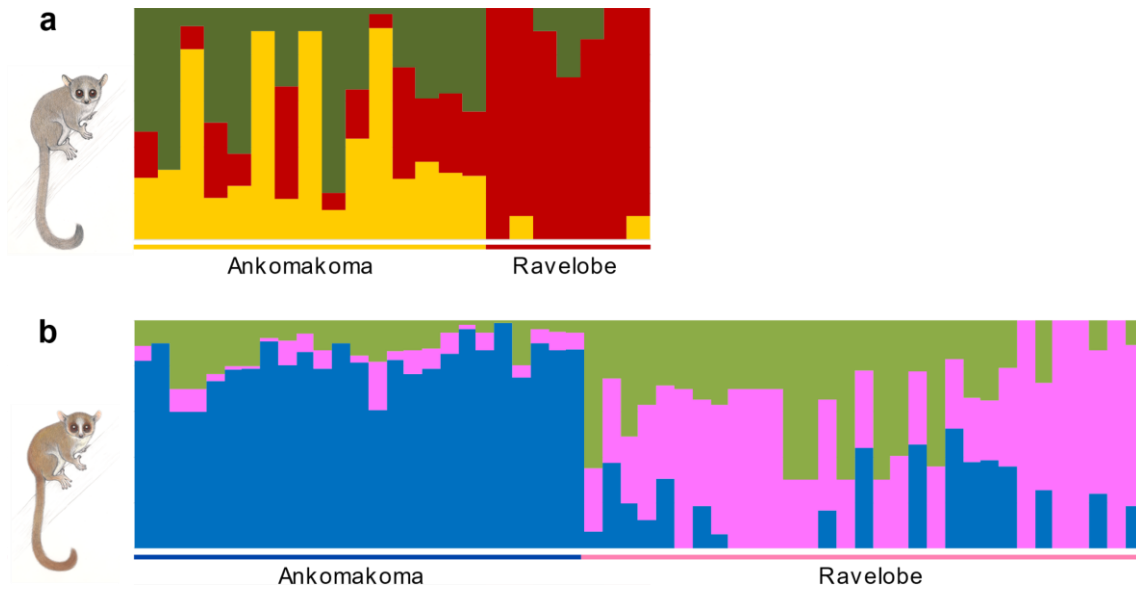

**Figure S2.** Results of a population genomic structure analysis of the two mouse lemur species. **a** Cluster assignment of 22 *M. murinus* individuals and **b** Cluster assignment of 56 *M. ravelobensis* individuals to three genetic clusters under  $K = 3$  using dataset 1. Each single vertical bar represents one individual and each color a distinct genetic cluster. Samples are sorted according to sampling site and respective latitude. Animal illustrations copyright 2013 Stephen D. Nash / IUCN SSC Primate Specialist Group. Used with permission.

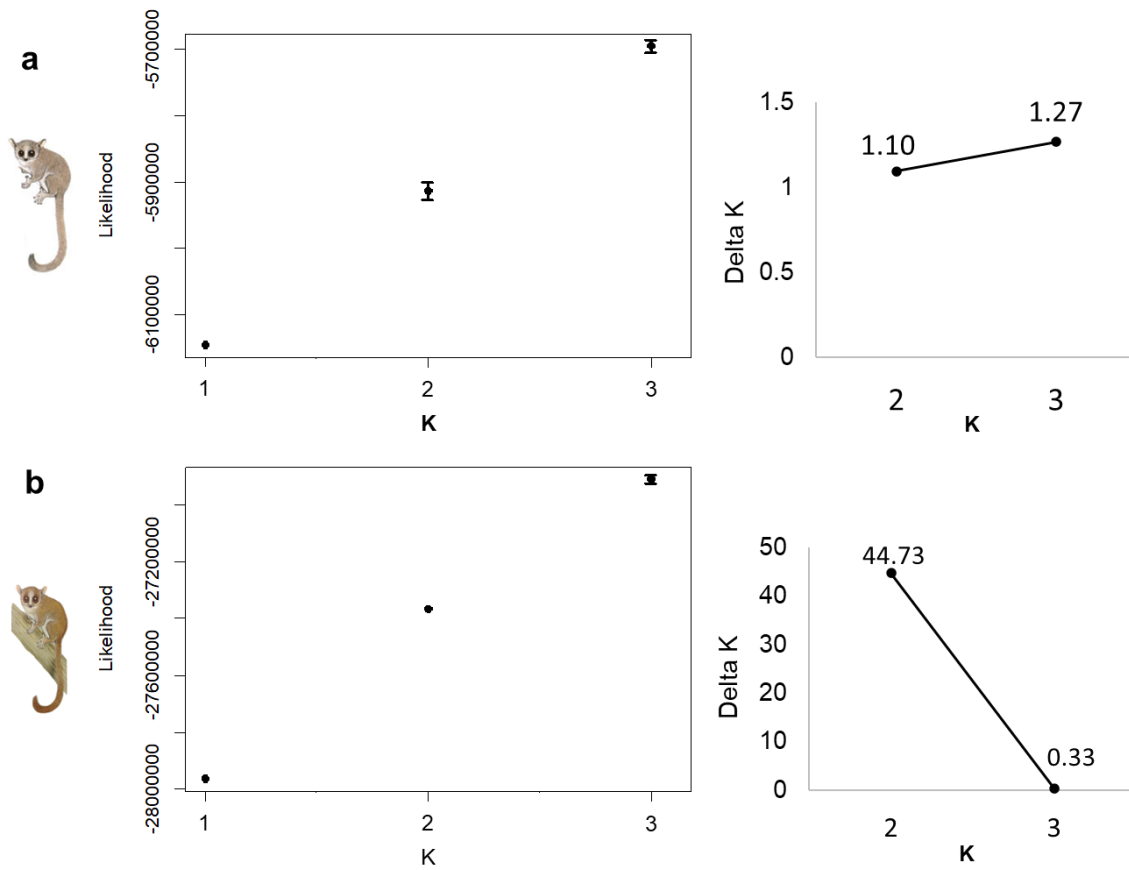

**Figure S3.** Number of clusters inferred by NGSadmix. **a** Likelihood results and delta K estimation suggest that the best K value for *M. murinus* is K = 3. **b** Likelihood results and delta K estimation suggest that the best K value for *M. ravelobensis* is K = 2. Delta K estimations followed the method of [12] over 10 replicate NGSadmix runs for each K value. Animal illustrations copyright 2013 Stephen D. Nash / IUCN SSC Primate Specialist Group. Used with permission.

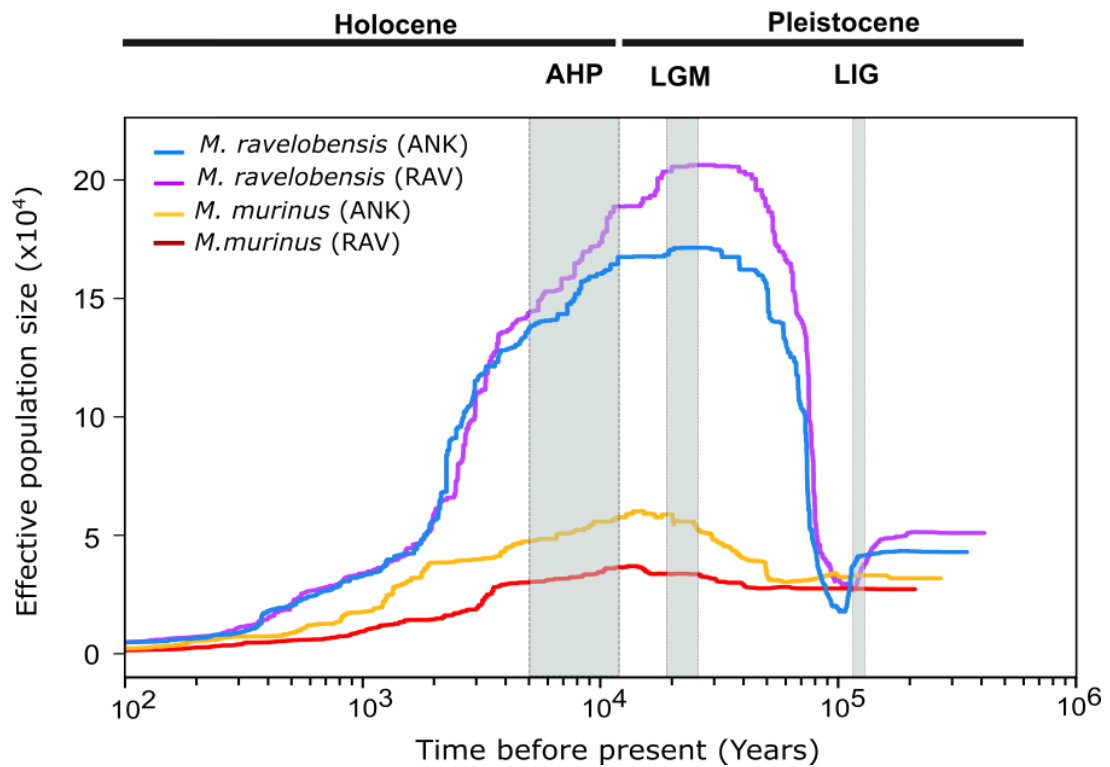

**Figure S4.** Demographic history inferred by the Stairway Plot method based on the entire dataset (*M. murinus*, Ravelobe = 7; *M. murinus*, Ankomakoma = 15; *M. ravelobensis*, Ravelobe = 30; *M. ravelobensis*, Ankomakoma = 25). The analyses were performed considering 2.5 years as generation time and  $1.2 \times 10^{-8}$  as mutation rate. The grey vertical bars identify three well-pronounced climatic events that took place in Africa: LIG (Last Interglacial), LGM (Last Glacial Maximum) and AHP (African Humid Period). RAV = Ravelobe; ANK = Ankomakoma

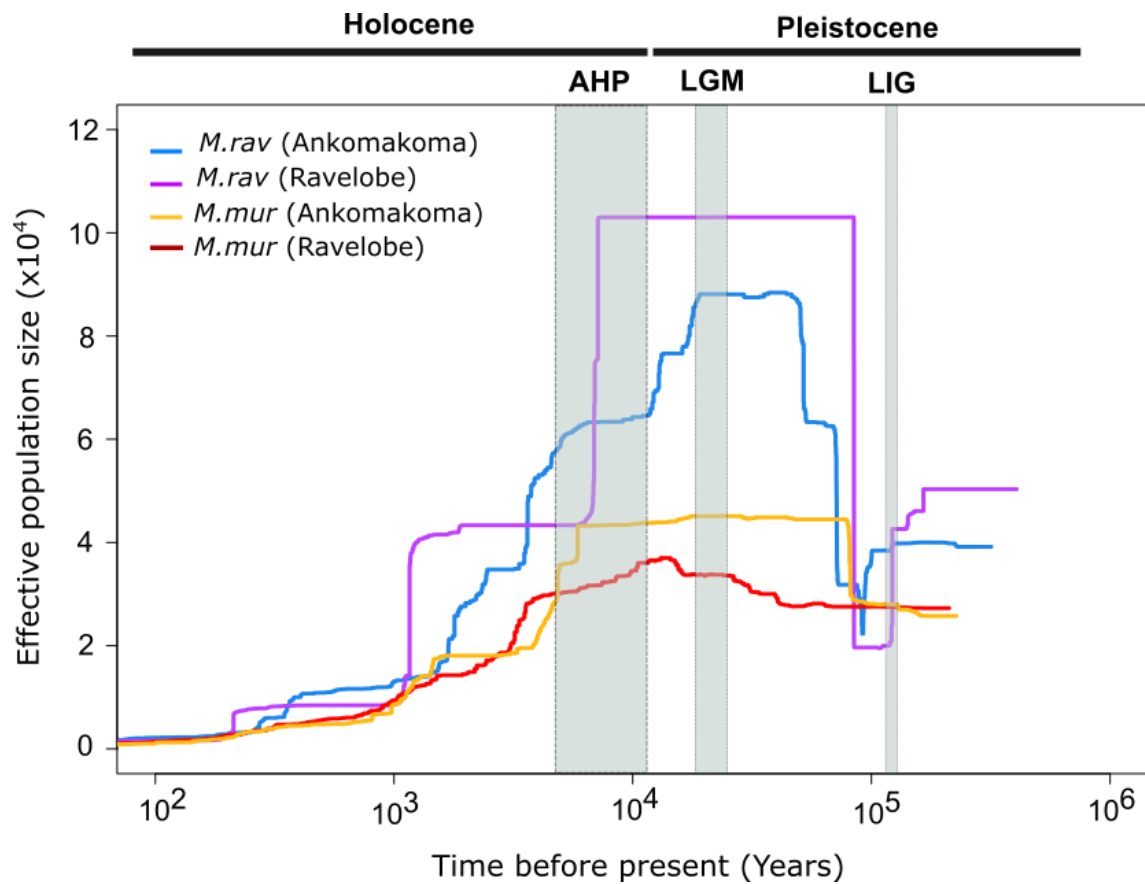

**Figure S5.** Reconstruction of the demographic history of *M. murinus* (*M. mur*) and *M. ravelobensis* (*M. rav*) using the *Stairway Plot* method, considering the same sample size for all populations ( $n = 7$ ). Individuals were selected randomly using R. All analyses were performed considering 2.5 years as generation time and  $1.2 \times 10^{-8}$  as mutation rate. The grey vertical bars identify three well-pronounced climatic events that took place in Africa: LIG (Last Interglacial), LGM (Last Glacial Maximum) and AHP (African Humid Period).

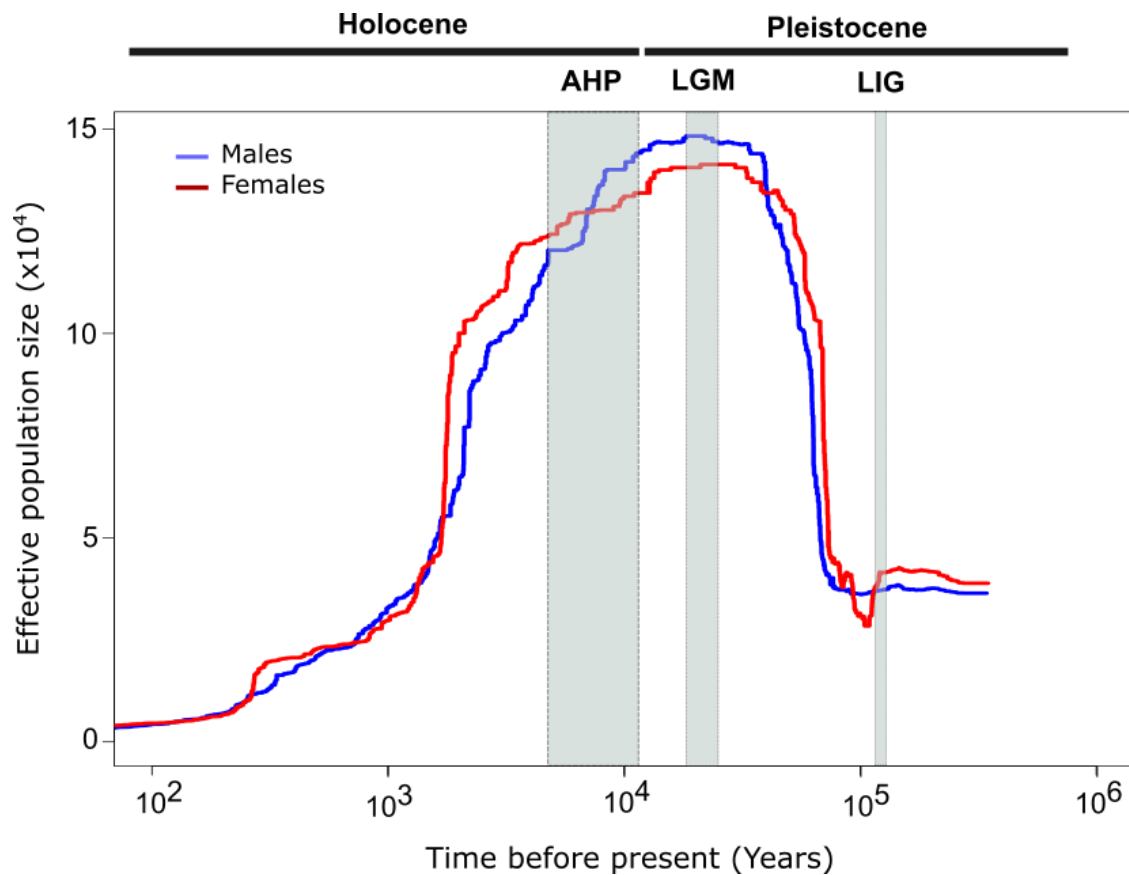

**Figure S6.** Reconstruction of the demographic history of *M. ravelobensis* using the *Stairway Plot* method, considering males and females separately. The analyses were performed considering all *M. ravelobensis* females available in our dataset ( $n = 22$ ) and an equal number of males. The males were selected randomly using R. All analyses were performed considering 2.5 years as generation time and  $1.2 \times 10^{-8}$  as mutation rate. The grey vertical bars identify three well-pronounced climatic events that took place in Africa: LIG (Last Interglacial), LGM (Last Glacial Maximum) and AHP (African Humid Period).

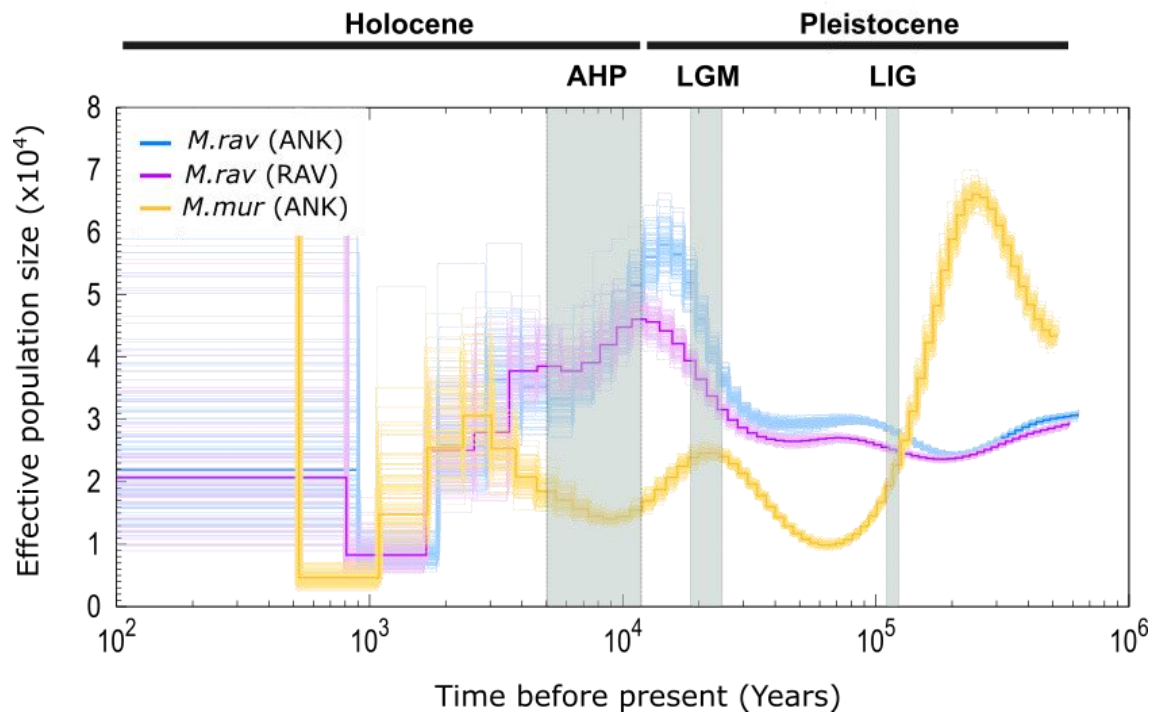

**Figure S7.** Demographic history inferred by the *PSMC* method using “64\*1” free atomic time intervals. The thick lines represent the inferred mean trajectories for three populations, and each light line represents one of 100 subsampled bootstrap replicates for each individual. The humps observed in *PSMC* plot of the two mouse lemur species during the last 2 – 5 kyr (Figure 3a) are no longer observed when considering “64\*1” free atomic time intervals, suggesting that those humps are an artefact. The analyses were performed considering 2.5 years as generation time and  $1.2 \times 10^{-8}$  as mutation rate. The grey vertical bars identify three well-pronounced climatic events that took place in Africa: LIG (Last Interglacial), LGM (Last Glacial Maximum) and AHP (African Humid Period). *M. rav* = *M. ravelobensis*; *M. mur* = *M. murinus*; RAV = Ravelobe; ANK = Ankomakoma.

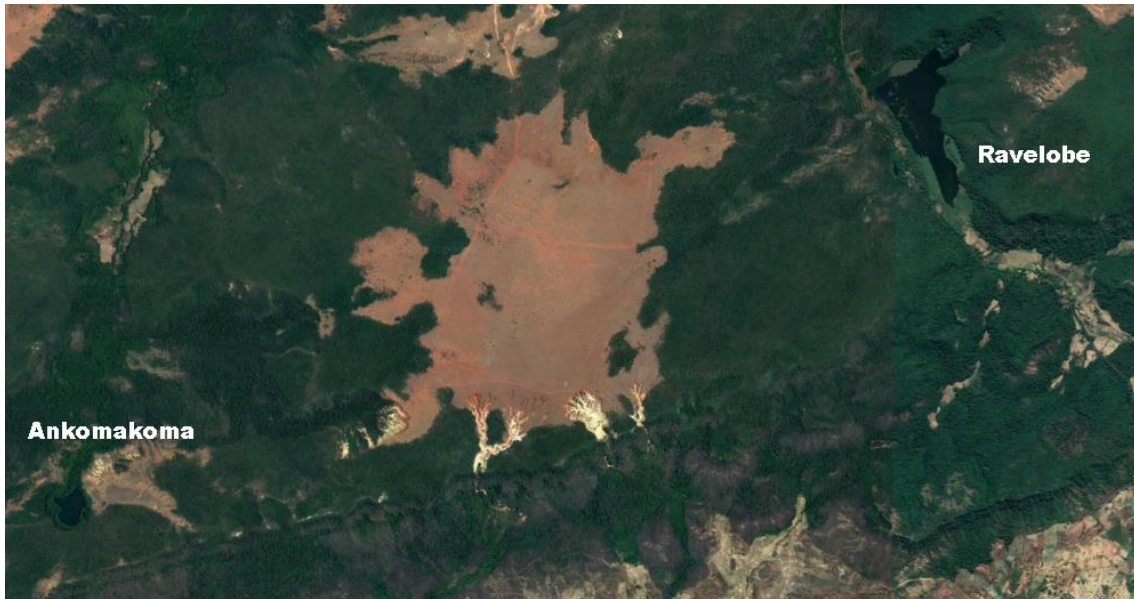

**Figure S8.** Satellite view of our study sites. Although Ankomakoma and Ravelobe are part of a mosaic landscape, the two sites are still connected via forest corridors that surrounded the savannah. Image was taken from *Google Earth* [13].

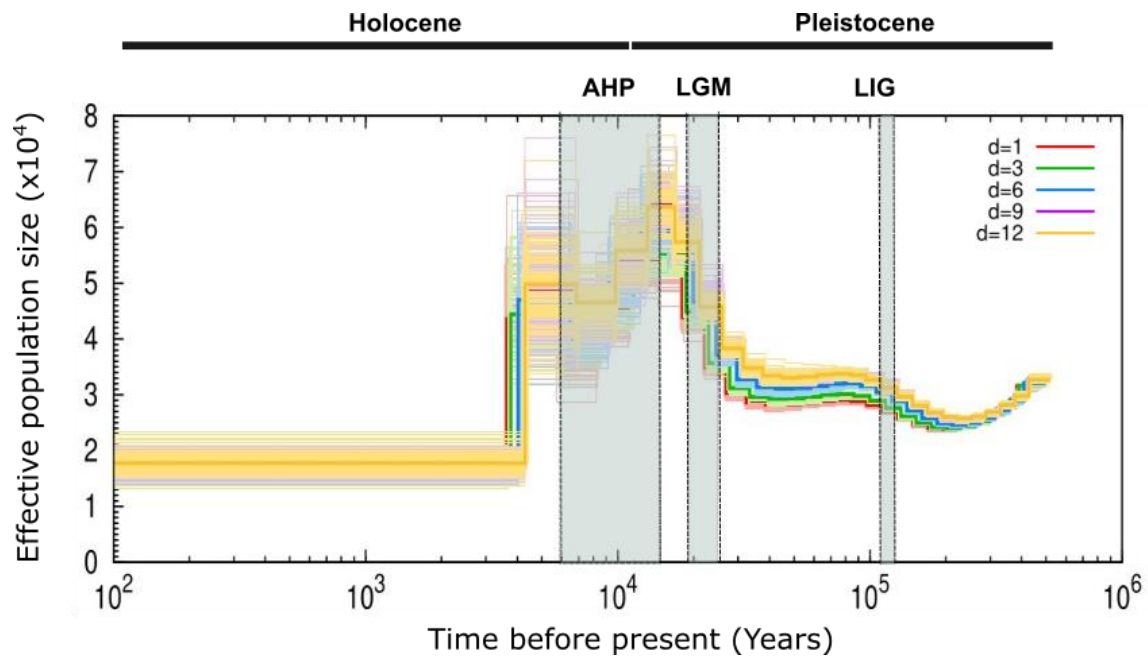

**Figure S9.** Impact of varying the minimum read depth ( $-d$ ) on the *PSMC* analyses for *M. ravelobensis* (Ankomakoma). The demographic dynamics of *M. ravelobensis* using different minimum read depth options ( $-d1$ ,  $-d3$ ,  $-d6$ ,  $-d9$ ,  $-d12$ ) resulted in similar demographic curves, suggesting that the sites considered in the *PSMC* analyses were of good quality. The analyses were performed considering 2.5 years as generation time and  $1.2 \times 10^{-8}$  as mutation rate. The grey vertical bars identify three well-pronounced climatic events that took place in Africa: LIG (Last Interglacial), LGM (Last Glacial Maximum) and AHP (African Humid Period).



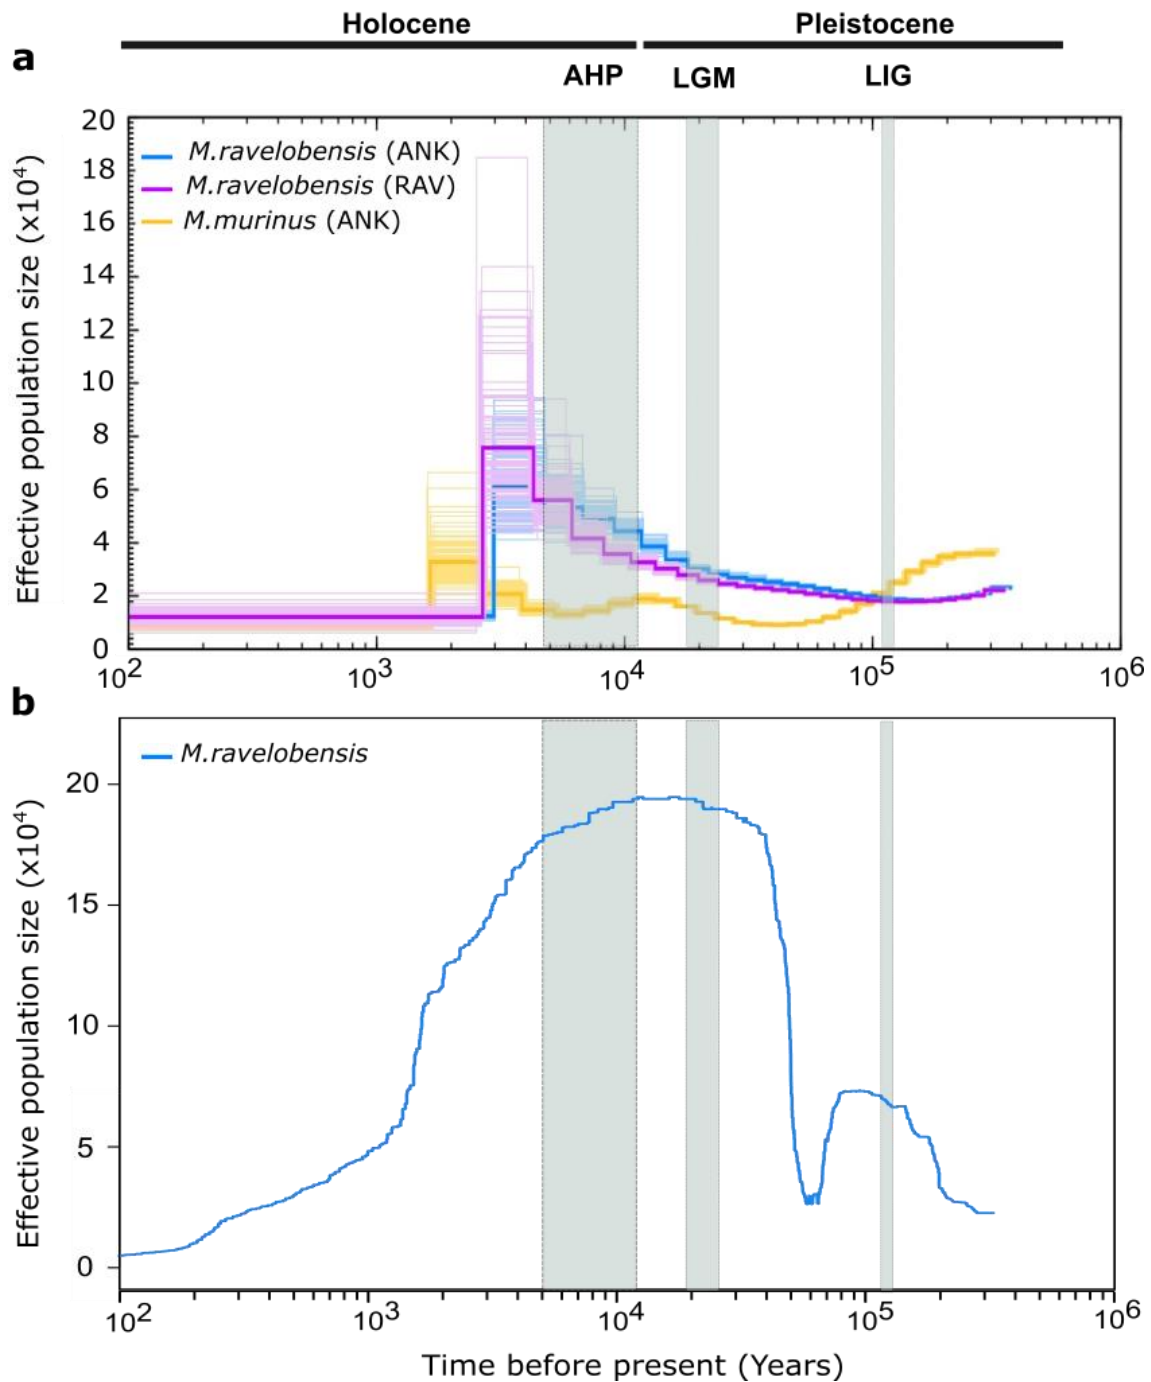

**Figure S10.** Impact of the exclusion of repeat regions in the demographic modelling. **a** Inferred trajectories for *M. murinus* and *M. ravelobensis* after the exclusion of the repeat regions using the *PSMC*. The results are identical to the ones generated using the full dataset, except for the population bottleneck that occurred during the African Humid Period for the *M. ravelobensis*. These results suggest that larger datasets are essential to correctly infer recent demographic dynamics with this method. **b** Inferred trajectory for *M. ravelobensis* ( $n = 55$ ) after the exclusion of the repeat regions using the *Stairway Plot* method. The results are identical to the ones generated using the full dataset. The grey vertical bars identify three well-pronounced climatic events that took place in Africa: Lig (Last Interglacial), LGM (Last Glacial Maximum) and AHP (African Humid Period).

**Table S1.** Elevation range in which each species was trapped along each transect in both study sites. M.rav: *M. ravelobensis*; M.mur: *M. murinus*; a.s.l.: above sea level. See Figure 1b,c for visual representation of the transects.

| Study site | Transect | Species occurrence | Occurrence of <i>M. ravelobensis</i> (m a.s.l.) | Occurrence of <i>M. murinus</i> (m a.s.l.) |
|------------|----------|--------------------|-------------------------------------------------|--------------------------------------------|
| Ravelobe   | T1       | M.rav              | 101 - 159                                       | –                                          |
|            | T2       | M.rav              | 109 - 114                                       | –                                          |
|            | T3       | M.rav              | 88 - 90                                         | –                                          |
|            | T4       | M.rav; M.mur       | 119 - 140                                       | 133 - 161                                  |
| Ankomakoma | T1       | M.rav              | 108 - 129                                       | –                                          |
|            | T2       | M.rav; M.mur       | 105 - 132                                       | 112 - 125                                  |
|            | T3       | M.mur              | –                                               | 106 - 153                                  |
|            | T4       | M.rav              | 137 - 162                                       | –                                          |

**Table S2.** Mean depth for the *M. murinus* individuals used for the genomic analyses (n = 22). The mean depth per individual ranged between 13.82 and 42.18. N sites = number of sites per individual used to estimate the mean depth per individual with VCFtools.

| Study site | Sample ID | N sites | mean depth |
|------------|-----------|---------|------------|
| Ravelobe   | M53       | 105233  | 15.23      |
| Ravelobe   | M54       | 121972  | 29.72      |
| Ravelobe   | M59       | 116579  | 17.76      |
| Ravelobe   | M91       | 101100  | 14.96      |
| Ravelobe   | M92       | 121084  | 22.52      |
| Ravelobe   | M93       | 95655   | 14.72      |
| Ravelobe   | F94       | 59066   | 13.82      |
| Ankomakoma | F104      | 119616  | 19.40      |
| Ankomakoma | F106      | 122023  | 32.01      |
| Ankomakoma | F107      | 122037  | 42.18      |
| Ankomakoma | F108      | 111094  | 15.96      |
| Ankomakoma | F118      | 103530  | 14.97      |
| Ankomakoma | F145      | 122037  | 38.78      |
| Ankomakoma | F148      | 121883  | 26.38      |
| Ankomakoma | M109      | 122016  | 38.23      |
| Ankomakoma | M110      | 107273  | 15.45      |
| Ankomakoma | M112      | 122043  | 36.63      |
| Ankomakoma | M115      | 104094  | 15.06      |
| Ankomakoma | M116      | 97809   | 14.59      |
| Ankomakoma | M143      | 121947  | 40.34      |
| Ankomakoma | M147      | 122006  | 32.40      |
| Ankomakoma | M153      | 120117  | 20.87      |

**Table S3.** Mean depth for the *M. ravelobensis* individuals used for the genomic analyses (n = 55). The mean depth per individual ranged between 13.96 and 47.88. N sites = number of sites per individual used to estimate the mean depth per individual with VCFtools.

| Study site | Sample ID | N sites | Mean depth |
|------------|-----------|---------|------------|
| Ravelobe   | F20       | 241353  | 22.92      |
| Ravelobe   | F21       | 220745  | 15.60      |
| Ravelobe   | F22       | 236833  | 18.26      |
| Ravelobe   | F25       | 241846  | 27.66      |
| Ravelobe   | F30       | 241451  | 23.63      |
| Ravelobe   | F41       | 241856  | 25.41      |
| Ravelobe   | F62       | 217447  | 19.74      |
| Ravelobe   | F77       | 211980  | 15.32      |
| Ravelobe   | F80       | 211035  | 15.38      |
| Ravelobe   | F82       | 242039  | 30.03      |
| Ravelobe   | F83       | 240608  | 21.48      |
| Ravelobe   | F87       | 158148  | 13.96      |
| Ravelobe   | F88       | 221094  | 15.63      |
| Ravelobe   | M18       | 241860  | 26.96      |
| Ravelobe   | M19       | 241945  | 26.68      |
| Ravelobe   | M29       | 234896  | 17.71      |
| Ravelobe   | M42       | 226819  | 16.36      |
| Ravelobe   | M48       | 232774  | 17.22      |
| Ravelobe   | M52       | 218556  | 15.46      |
| Ravelobe   | M55       | 239865  | 20.24      |
| Ravelobe   | M56       | 234718  | 17.44      |
| Ravelobe   | M57       | 241744  | 25.52      |
| Ravelobe   | M58       | 241827  | 25.96      |
| Ravelobe   | M60       | 239142  | 20.20      |
| Ravelobe   | M67       | 241688  | 25.04      |
| Ravelobe   | M68       | 239012  | 21.49      |
| Ravelobe   | M79       | 241424  | 23.45      |
| Ravelobe   | M81       | 241879  | 27.19      |
| Ravelobe   | M90       | 206033  | 14.55      |
| Ravelobe   | M95       | 241845  | 26.99      |
| Ankomakoma | F119      | 242087  | 38.59      |
| Ankomakoma | F126      | 242083  | 33.95      |
| Ankomakoma | F129      | 242072  | 46.77      |
| Ankomakoma | F132      | 242080  | 42.47      |
| Ankomakoma | F157      | 242026  | 30.80      |
| Ankomakoma | F165      | 242080  | 35.65      |
| Ankomakoma | F166      | 242057  | 35.96      |
| Ankomakoma | F169      | 242069  | 36.66      |
| Ankomakoma | F98       | 194516  | 14.29      |
| Ankomakoma | F99       | 240296  | 21.32      |

|            |      |        |       |
|------------|------|--------|-------|
| Ankomakoma | M101 | 242113 | 40.43 |
| Ankomakoma | M102 | 242079 | 37.27 |
| Ankomakoma | M120 | 241952 | 28.99 |
| Ankomakoma | M121 | 242081 | 38.56 |
| Ankomakoma | M127 | 242108 | 47.88 |
| Ankomakoma | M130 | 241596 | 24.97 |
| Ankomakoma | M135 | 242100 | 44.92 |
| Ankomakoma | M138 | 242079 | 45.60 |
| Ankomakoma | M140 | 241188 | 25.73 |
| Ankomakoma | M141 | 242060 | 44.51 |
| Ankomakoma | M154 | 242007 | 30.78 |
| Ankomakoma | M158 | 242037 | 33.51 |
| Ankomakoma | M159 | 242063 | 39.08 |
| Ankomakoma | M161 | 242063 | 43.70 |
| Ankomakoma | M163 | 241718 | 25.66 |

---

**Table S4.** Summary of the demographic dynamics reconstructions for *M. ravelobensis* and *M. murinus* assuming population panmixia (*PSMC* and *Stairway Plot*) or population structure (*IICR*-simulations). The demographic dynamics that were in line with the available paleoenvironmental and the resulting demographic hypothesis are marked with a green check, while the dynamics that were not in concordance with the respective hypothesis are marked with a not applicable icon. The demographic dynamics of both mouse lemur species were better explained by a mix of population size and connectivity changes. These results suggest that population structure played an important role in the demographic dynamics of *M. ravelobensis* and *M. murinus*. NA = Hypothesis is not applicable to this study species.

| Climatic event   | Demographic hypothesis                                                                       | <i>M. ravelobensis</i> |           | <i>M. murinus</i> |           |
|------------------|----------------------------------------------------------------------------------------------|------------------------|-----------|-------------------|-----------|
|                  |                                                                                              | Panmixia               | Structure | Panmixia          | Structure |
| Late Pleistocene | <i>M. murinus</i> : founder effect during its colonization of NW Madagascar                  | NA                     | NA        | ✓                 | NA        |
| LGM              | <i>M. ravelobensis</i> : bottleneck and/or reduced connectivity                              | ⊘                      | ✓         | NA                | NA        |
| AHP              | <i>M. ravelobensis</i> & <i>M. murinus</i> : population expansion and/or higher connectivity | ⊘                      | ⊘         | ⊘                 | ✓         |
| AHP termination  | <i>M. ravelobensis</i> & <i>M. murinus</i> : bottleneck and/or reduced connectivity          | ✓                      | ✓         | ✓                 | ✓         |

**Table S5.** Genomic diversity summary statistics for each *M. murinus* and *M. ravelobensis* study site using dataset 2. Rav = Ravelobe; Ank = Ankomakoma; n = Sample size (where M = number of males and F = number of females); % Poly = % Polymorphic sites;  $H_e$  = unbiased expected heterozygosity (estimated according to [6]);  $H_o$  = observed heterozygosity;  $F_{IS}$  = population inbreeding coefficient (n.s.;  $p > 0.05$ ).

| Species                | Pop | n            | % Poly | $H_e$                 | $H_o$                 | $F_{IS}$ |
|------------------------|-----|--------------|--------|-----------------------|-----------------------|----------|
| <i>M. murinus</i>      | Rav | 7 (7M)       | 11.5   | 0.323 ( $\pm 0.156$ ) | 0.364 ( $\pm 0.256$ ) | -0.203   |
|                        | Ank | 15 (8M/7F)   | 22.3   | 0.266 ( $\pm 0.166$ ) | 0.288 ( $\pm 0.231$ ) | -0.122   |
| <i>M. ravelobensis</i> | Rav | 30 (17M/13F) | 27.0   | 0.205 ( $\pm 0.164$ ) | 0.220 ( $\pm 0.206$ ) | -0.101   |
|                        | Ank | 25 (16M/9F)  | 44.0   | 0.218 ( $\pm 0.163$ ) | 0.230 ( $\pm 0.199$ ) | -0.069   |

**Table S6.** Individual inbreeding coefficients ( $F$ ) estimated for the *M. ravelobensis* dataset ( $n = 56$ ).  $F = 0$  reflects random mating (HWE) and  $F = 1$  the absence of heterozygous genotypes or a totally inbred sample [14]. One individual (M73) showed a highly negative  $F$  value, suggesting a deviation from HWE and it was therefore removed from our dataset.

| Site            | Sample ID  | Inbreeding coefficient ( $F$ ) |
|-----------------|------------|--------------------------------|
| Ravelobe        | F20        | 0.071                          |
| Ravelobe        | F21        | 0.014                          |
| Ravelobe        | F22        | 0.007                          |
| Ravelobe        | F25        | 0.084                          |
| Ravelobe        | F30        | 0.090                          |
| Ravelobe        | F41        | 0.097                          |
| Ravelobe        | F62        | -0.002                         |
| Ravelobe        | F77        | 0.087                          |
| Ravelobe        | F80        | 0.033                          |
| Ravelobe        | F82        | 0.031                          |
| Ravelobe        | F83        | 0.088                          |
| Ravelobe        | F87        | 0.046                          |
| Ravelobe        | F88        | 0.091                          |
| Ravelobe        | M18        | 0.091                          |
| Ravelobe        | M19        | 0.089                          |
| Ravelobe        | M29        | 0.073                          |
| Ravelobe        | M42        | 0.011                          |
| Ravelobe        | M48        | 0.045                          |
| Ravelobe        | M52        | 0.038                          |
| Ravelobe        | M55        | 0.075                          |
| Ravelobe        | M56        | 0.090                          |
| Ravelobe        | M57        | 0.078                          |
| Ravelobe        | M58        | -0.003                         |
| Ravelobe        | M60        | 0.022                          |
| Ravelobe        | M67        | 0.033                          |
| Ravelobe        | M68        | 0.014                          |
| <b>Ravelobe</b> | <b>M73</b> | <b>-0.476</b>                  |
| Ravelobe        | M79        | 0.069                          |
| Ravelobe        | M81        | 0.041                          |
| Ravelobe        | M90        | 0.048                          |
| Ravelobe        | M95        | 0.069                          |
| Ankomakoma      | F119       | -0.007                         |
| Ankomakoma      | F126       | 0.004                          |
| Ankomakoma      | F129       | 0.036                          |
| Ankomakoma      | F132       | 0.046                          |
| Ankomakoma      | F157       | 0.023                          |
| Ankomakoma      | F165       | 0.064                          |
| Ankomakoma      | F166       | 0.052                          |
| Ankomakoma      | F169       | 0.033                          |
| Ankomakoma      | F98        | 0.066                          |



|            |      |        |
|------------|------|--------|
| Ankomakoma | F99  | 0.063  |
| Ankomakoma | M101 | 0.039  |
| Ankomakoma | M102 | 0.001  |
| Ankomakoma | M120 | 0.045  |
| Ankomakoma | M121 | 0.008  |
| Ankomakoma | M127 | 0.032  |
| Ankomakoma | M130 | 0.025  |
| Ankomakoma | M135 | 0.040  |
| Ankomakoma | M138 | -0.152 |
| Ankomakoma | M140 | 0.006  |
| Ankomakoma | M141 | 0.069  |
| Ankomakoma | M154 | 0.017  |
| Ankomakoma | M158 | 0.045  |
| Ankomakoma | M159 | 0.022  |
| Ankomakoma | M161 | 0.074  |
| Ankomakoma | M163 | 0.029  |

---

**Table S7.** Individual inbreeding coefficients ( $F$ ) estimated for the *M. murinus* dataset ( $n = 22$ ).  $F = 0$  reflects random mating (HWE) and  $F = 1$  the absence of heterozygous genotypes or a totally inbred sample [14]. No significant deviations from HWE were found in our dataset and all individuals were kept for downstream analyses.

| Site       | Sample ID | Inbreeding coefficient ( $F$ ) |
|------------|-----------|--------------------------------|
| Ravelobe   | M54       | -0.070                         |
| Ravelobe   | M59       | -0.021                         |
| Ravelobe   | M91       | -0.006                         |
| Ravelobe   | M92       | -0.012                         |
| Ravelobe   | M93       | 0.020                          |
| Ravelobe   | F94       | -0.004                         |
| Ankomakoma | F104      | 0.007                          |
| Ankomakoma | F106      | -0.027                         |
| Ankomakoma | F107      | -0.003                         |
| Ankomakoma | F108      | 0.035                          |
| Ankomakoma | F118      | -0.006                         |
| Ankomakoma | F145      | -0.008                         |
| Ankomakoma | F148      | -0.019                         |
| Ankomakoma | M109      | 0.026                          |
| Ankomakoma | M110      | 0.020                          |
| Ankomakoma | M112      | 0.007                          |
| Ankomakoma | M115      | 0.035                          |
| Ankomakoma | M116      | 0.044                          |
| Ankomakoma | M143      | 0.249                          |
| Ankomakoma | M147      | 0.030                          |
| Ankomakoma | M153      | 0.018                          |
| Ankomakoma | M53       | 0.021                          |

**Table S8.** List of individuals used for the different genomic analyses for each species and respective sampling locations. All individuals (without close relatives) were considered for the clustering (NGSadmix and PCA) and inbreeding analyses. The individual M73 from *M. ravelobensis* (Ravelobe) was not considered in the downstream analyses because it showed departure from HWE. *Stairway Plot* analyses were performed using the entire datasets and with a subset of the samples (n = 7) to control for differences in population size. Finally, the *PSMC* analyses were performed considering one *M. murinus* sampled in Ankomakoma and one *M. ravelobensis* sampled in each study site.

| Species           | Site       | Sample ID | Latitude (°N) | Longitude (°E) | Sex | NGSadmix/ PCA | Stairway Plot all | Stairway Plot (n = 7) | PSMC |
|-------------------|------------|-----------|---------------|----------------|-----|---------------|-------------------|-----------------------|------|
| <i>M. murinus</i> | Ankomakoma | F104      | -16.344838    | 46.738467      | F   | X             | X                 | X                     |      |
| <i>M. murinus</i> | Ankomakoma | F106      | -16.346087    | 46.739956      | F   | X             | X                 |                       |      |
| <i>M. murinus</i> | Ankomakoma | F107      | -16.346319    | 46.74069       | F   | X             | X                 | X                     |      |
| <i>M. murinus</i> | Ankomakoma | F108      | -16.343119    | 46.741413      | F   | X             | X                 |                       |      |
| <i>M. murinus</i> | Ankomakoma | F118      | -16.346289    | 46.740222      | F   | X             | X                 |                       |      |
| <i>M. murinus</i> | Ankomakoma | F145      | -16.346855    | 46.744649      | F   | X             | X                 |                       | X    |
| <i>M. murinus</i> | Ankomakoma | F148      | -16.345054    | 46.7429        | F   | X             | X                 | X                     |      |
| <i>M. murinus</i> | Ankomakoma | M109      | -16.34321     | 46.741629      | M   | X             | X                 |                       |      |
| <i>M. murinus</i> | Ankomakoma | M110      | -16.343939    | 46.742323      | M   | X             | X                 | X                     |      |
| <i>M. murinus</i> | Ankomakoma | M112      | -16.346244    | 46.744077      | M   | X             | X                 |                       |      |
| <i>M. murinus</i> | Ankomakoma | M115      | -16.346319    | 46.74069       | M   | X             | X                 |                       |      |
| <i>M. murinus</i> | Ankomakoma | M116      | -16.346319    | 46.74069       | M   | X             | X                 | X                     |      |
| <i>M. murinus</i> | Ankomakoma | M143      | -16.346839    | 46.745813      | M   | X             | X                 |                       |      |
| <i>M. murinus</i> | Ankomakoma | M147      | -16.345566    | 46.743299      | M   | X             | X                 | X                     |      |
| <i>M. murinus</i> | Ankomakoma | M153      | -16.343819    | 46.742186      | M   | X             | X                 | X                     |      |
| <i>M. murinus</i> | Ravelobe   | M53       | -16.306787    | 46.826026      | M   | X             | X                 | X                     |      |
| <i>M. murinus</i> | Ravelobe   | M54       | -16.307775    | 46.825124      | M   | X             | X                 | X                     |      |
| <i>M. murinus</i> | Ravelobe   | M59       | -16.307775    | 46.825124      | M   | X             | X                 | X                     |      |
| <i>M. murinus</i> | Ravelobe   | M91       | -16.309582    | 46.823081      | M   | X             | X                 | X                     |      |
| <i>M. murinus</i> | Ravelobe   | M92       | -16.308552    | 46.82424       | M   | X             | X                 | X                     |      |

|                        |            |      |            |           |   |   |   |   |
|------------------------|------------|------|------------|-----------|---|---|---|---|
| <i>M. murinus</i>      | Ravelobe   | M93  | -16.30813  | 46.824643 | M | X | X | X |
| <i>M. murinus</i>      | Ravelobe   | F94  | -16.306257 | 46.82613  | F | X | X | X |
| <i>M. ravelobensis</i> | Ankomakoma | F119 | -16.345218 | 46.738692 | F | X | X | X |
| <i>M. ravelobensis</i> | Ankomakoma | F126 | -16.34814  | 46.732226 | F | X | X |   |
| <i>M. ravelobensis</i> | Ankomakoma | F129 | -16.348432 | 46.733121 | F | X | X |   |
| <i>M. ravelobensis</i> | Ankomakoma | F132 | -16.348398 | 46.733852 | F | X | X |   |
| <i>M. ravelobensis</i> | Ankomakoma | F157 | -16.348665 | 46.734507 | F | X | X | X |
| <i>M. ravelobensis</i> | Ankomakoma | F165 | -16.333502 | 46.735526 | F | X | X |   |
| <i>M. ravelobensis</i> | Ankomakoma | F166 | -16.332714 | 46.735417 | F | X | X |   |
| <i>M. ravelobensis</i> | Ankomakoma | F169 | -16.330171 | 46.73505  | F | X | X |   |
| <i>M. ravelobensis</i> | Ankomakoma | F98  | -16.333198 | 46.735454 | F | X | X |   |
| <i>M. ravelobensis</i> | Ankomakoma | F99  | -16.329861 | 46.735221 | M | X | X | X |
| <i>M. ravelobensis</i> | Ankomakoma | M101 | -16.343743 | 46.737262 | M | X | X | X |
| <i>M. ravelobensis</i> | Ankomakoma | M102 | -16.344501 | 46.738275 | M | X | X |   |
| <i>M. ravelobensis</i> | Ankomakoma | M120 | -16.344292 | 46.737947 | M | X | X | X |
| <i>M. ravelobensis</i> | Ankomakoma | M121 | -16.343307 | 46.736867 | M | X | X | X |
| <i>M. ravelobensis</i> | Ankomakoma | M127 | -16.348243 | 46.732361 | M | X | X |   |
| <i>M. ravelobensis</i> | Ankomakoma | M130 | -16.348552 | 46.733402 | M | X | X |   |
| <i>M. ravelobensis</i> | Ankomakoma | M135 | -16.335652 | 46.737288 | M | X | X | X |
| <i>M. ravelobensis</i> | Ankomakoma | M138 | -16.331646 | 46.735075 | M | X | X |   |
| <i>M. ravelobensis</i> | Ankomakoma | M140 | -16.332035 | 46.735127 | M | X | X |   |
| <i>M. ravelobensis</i> | Ankomakoma | M141 | -16.329984 | 46.735127 | M | X | X |   |
| <i>M. ravelobensis</i> | Ankomakoma | M154 | -16.34896  | 46.735655 | M | X | X |   |
| <i>M. ravelobensis</i> | Ankomakoma | M158 | -16.347931 | 46.731252 | M | X | X |   |
| <i>M. ravelobensis</i> | Ankomakoma | M159 | -16.347938 | 46.73081  | M | X | X |   |
| <i>M. ravelobensis</i> | Ankomakoma | M161 | -16.347608 | 46.729031 | M | X | X | X |
| <i>M. ravelobensis</i> | Ankomakoma | M163 | -16.335266 | 46.736924 | M | X | X |   |
| <i>M. ravelobensis</i> | Ravelobe   | M18  | -16.308878 | 46.80416  | M | X | X | X |

|                        |          |     |            |           |   |   |   |   |
|------------------------|----------|-----|------------|-----------|---|---|---|---|
| <i>M. ravelobensis</i> | Ravelobe | M19 | -16.307487 | 46.806598 | M | X | X | X |
| <i>M. ravelobensis</i> | Ravelobe | M29 | -16.302069 | 46.81621  | M | X | X |   |
| <i>M. ravelobensis</i> | Ravelobe | M42 | -16.308663 | 46.819754 | M | X | X |   |
| <i>M. ravelobensis</i> | Ravelobe | M48 | -16.3146   | 46.822572 | M | X | X |   |
| <i>M. ravelobensis</i> | Ravelobe | M52 | -16.309204 | 46.823946 | M | X | X | X |
| <i>M. ravelobensis</i> | Ravelobe | M55 | -16.306982 | 46.807239 | M | X | X |   |
| <i>M. ravelobensis</i> | Ravelobe | M56 | -16.307058 | 46.809144 | M | X | X |   |
| <i>M. ravelobensis</i> | Ravelobe | M57 | -16.312068 | 46.82317  | M | X | X |   |
| <i>M. ravelobensis</i> | Ravelobe | M58 | -16.308708 | 46.824182 | M | X | X |   |
| <i>M. ravelobensis</i> | Ravelobe | M60 | -16.308898 | 46.824186 | M | X | X |   |
| <i>M. ravelobensis</i> | Ravelobe | M67 | -16.300921 | 46.821531 | M | X | X |   |
| <i>M. ravelobensis</i> | Ravelobe | M68 | -16.301686 | 46.820723 | M | X | X | X |
| <i>M. ravelobensis</i> | Ravelobe | M73 | -16.315202 | 46.822935 | M | X |   |   |
| <i>M. ravelobensis</i> | Ravelobe | M79 | -16.312672 | 46.821591 | M | X | X |   |
| <i>M. ravelobensis</i> | Ravelobe | M81 | -16.312081 | 46.821911 | M | X | X |   |
| <i>M. ravelobensis</i> | Ravelobe | M90 | -16.31107  | 46.82303  | M | X | X |   |
| <i>M. ravelobensis</i> | Ravelobe | M95 | -16.308149 | 46.805682 | M | X | X |   |
| <i>M. ravelobensis</i> | Ravelobe | F20 | -16.300819 | 46.821725 | F | X | X |   |
| <i>M. ravelobensis</i> | Ravelobe | F21 | -16.30211  | 46.819893 | F | X | X |   |
| <i>M. ravelobensis</i> | Ravelobe | F22 | -16.301641 | 46.819766 | F | X | X |   |
| <i>M. ravelobensis</i> | Ravelobe | F25 | -16.301265 | 46.81883  | F | X | X |   |
| <i>M. ravelobensis</i> | Ravelobe | F30 | -16.302452 | 46.815375 | F | X | X | X |
| <i>M. ravelobensis</i> | Ravelobe | F41 | -16.314803 | 46.822804 | F | X | X | X |
| <i>M. ravelobensis</i> | Ravelobe | F62 | -16.30906  | 46.824098 | F | X | X |   |
| <i>M. ravelobensis</i> | Ravelobe | F77 | -16.31355  | 46.8218   | F | X | X |   |
| <i>M. ravelobensis</i> | Ravelobe | F80 | -16.311509 | 46.821839 | F | X | X | X |
| <i>M. ravelobensis</i> | Ravelobe | F82 | -16.31022  | 46.821199 | F | X | X |   |
| <i>M. ravelobensis</i> | Ravelobe | F83 | -16.308954 | 46.820228 | F | X | X | X |

|                        |          |     |            |           |   |   |   |
|------------------------|----------|-----|------------|-----------|---|---|---|
| <i>M. ravelobensis</i> | Ravelobe | F87 | -16.307968 | 46.819708 | F | X | X |
| <i>M. ravelobensis</i> | Ravelobe | F88 | -16.311903 | 46.823296 | F | X | X |

**Table S9.** Information regarding the number of raw reads obtained from the Illumina sequencing (# raw reads), the number of reads that pass the quality filters (# reads after filtering), the number of reads that were maintained after the read alignment against the reference genome (# reads after filtering), and the final number of reads that were kept for downstream analyses (# reads without PCR duplicates) for the 22 unrelated *M. murinus* samples (7 Ravelobe and 15 Ankomakoma).

| Study site | Sample ID | # raw reads | # reads after filtering | # reads after mapping | # reads without PCR duplicates |
|------------|-----------|-------------|-------------------------|-----------------------|--------------------------------|
| Ravelobe   | M53       | 4706762     | 4176302                 | 3959272               | 2959797                        |
| Ravelobe   | M54       | 10173474    | 8439824                 | 7803553               | 6675179                        |
| Ravelobe   | M59       | 6221496     | 4931036                 | 4662680               | 3649993                        |
| Ravelobe   | M91       | 4131552     | 3683558                 | 3561718               | 2752535                        |
| Ravelobe   | M92       | 7657852     | 6839834                 | 6574624               | 4718290                        |
| Ravelobe   | M93       | 4034328     | 3593830                 | 3473117               | 2678990                        |
| Ravelobe   | F94       | 3529168     | 2963270                 | 2714048               | 2323009                        |
| Ankomakoma | F104      | 6523524     | 5395046                 | 4985213               | 4283736                        |
| Ankomakoma | F106      | 11899328    | 10357272                | 9763181               | 7355217                        |
| Ankomakoma | F107      | 15803430    | 13760734                | 12996027              | 9619186                        |
| Ankomakoma | F108      | 5012064     | 4386188                 | 4133430               | 3332821                        |
| Ankomakoma | F118      | 4193164     | 3548674                 | 3304485               | 2955094                        |
| Ankomakoma | F145      | 14674322    | 12804302                | 12062027              | 8950340                        |
| Ankomakoma | F148      | 8909372     | 7412438                 | 6866175               | 5909654                        |
| Ankomakoma | M109      | 13931648    | 12186646                | 11515574              | 8578470                        |
| Ankomakoma | M110      | 4345738     | 3688712                 | 3435409               | 3069805                        |
| Ankomakoma | M112      | 13315206    | 11530986                | 10864451              | 8104711                        |
| Ankomakoma | M115      | 4131774     | 3486058                 | 3250098               | 2910721                        |
| Ankomakoma | M116      | 3600044     | 3534356                 | 3187171               | 2862544                        |
| Ankomakoma | M143      | 14745302    | 12801252                | 12041723              | 8932595                        |
| Ankomakoma | M147      | 11613968    | 10105056                | 9517477               | 7209773                        |
| Ankomakoma | M153      | 7082780     | 6224776                 | 5860194               | 4512990                        |

**Table S10.** Information regarding the number of raw reads obtained from the Illumina sequencing (# raw reads), the number of reads that pass the quality filters (# reads after filtering), the number of reads that were maintained after the read alignment against the reference genome (# reads after filtering), and the final number of reads that were kept for downstream analyses (# reads without PCR duplicates) for the 56 unrelated *M. ravelobensis* samples (31 Ravelobe and 25 Ankomakoma).

| Study site | Sample ID | # raw reads | # reads after filtering | # reads after mapping | # reads without PCR duplicates |
|------------|-----------|-------------|-------------------------|-----------------------|--------------------------------|
| Ravelobe   | F20       | 28528772    | 7113482                 | 6772011               | 4831626                        |
| Ravelobe   | F21       | 21156854    | 4235984                 | 4049956               | 3087415                        |
| Ravelobe   | F22       | 5558098     | 4720766                 | 4471175               | 3947638                        |
| Ravelobe   | F25       | 58123672    | 8501128                 | 8116708               | 5739055                        |
| Ravelobe   | F30       | 8129904     | 7266498                 | 6926482               | 4927203                        |
| Ravelobe   | F41       | 8838044     | 7887444                 | 7535708               | 5354344                        |
| Ravelobe   | F62       | 5080140     | 4156016                 | 3968820               | 3589260                        |
| Ravelobe   | F77       | 5916048     | 4894924                 | 4694210               | 2923671                        |
| Ravelobe   | F80       | 4570176     | 4095462                 | 3919926               | 2900030                        |
| Ravelobe   | F82       | 9305280     | 7881754                 | 7481544               | 6502397                        |
| Ravelobe   | F83       | 7159666     | 6400234                 | 6132212               | 4413963                        |
| Ravelobe   | F87       | 3324066     | 2824308                 | 2688945               | 2481757                        |
| Ravelobe   | F88       | 4374028     | 3650898                 | 3471998               | 3187091                        |
| Ravelobe   | M18       | 8466752     | 7197946                 | 6803186               | 5896938                        |
| Ravelobe   | M19       | 71414688    | 8124844                 | 7757127               | 5481242                        |
| Ravelobe   | M29       | 5281620     | 4406536                 | 4167438               | 3693149                        |
| Ravelobe   | M42       | 4590576     | 3891020                 | 3680040               | 3349695                        |
| Ravelobe   | M48       | 5729448     | 4577840                 | 4349856               | 3454207                        |
| Ravelobe   | M52       | 5033296     | 4056096                 | 3839551               | 3050626                        |
| Ravelobe   | M55       | 6788952     | 6054820                 | 5784430               | 4160609                        |
| Ravelobe   | M56       | 5811554     | 5184500                 | 4951429               | 3567787                        |
| Ravelobe   | M57       | 8610870     | 7348548                 | 6387468               | 5550607                        |
| Ravelobe   | M58       | 8061824     | 6720560                 | 6367259               | 5634880                        |
| Ravelobe   | M60       | 6448470     | 5759526                 | 5537053               | 4008336                        |
| Ravelobe   | M67       | 7668306     | 6525312                 | 6188608               | 5401009                        |
| Ravelobe   | M68       | 6804362     | 6089804                 | 5856734               | 4206378                        |
| Ravelobe   | M73       | 4747160     | 3952624                 | 3774305               | 3417907                        |
| Ravelobe   | M79       | 6891944     | 5861178                 | 5596801               | 4950520                        |
| Ravelobe   | M81       | 8227234     | 6811972                 | 6481569               | 5749194                        |
| Ravelobe   | M90       | 3760890     | 3172790                 | 3026282               | 2793325                        |
| Ravelobe   | M95       | 8047384     | 6742558                 | 6425237               | 5720089                        |
| Ankomakoma | F98       | 3631366     | 3102596                 | 2958474               | 2729584                        |
| Ankomakoma | F99       | 6485154     | 5663834                 | 5434859               | 4541666                        |
| Ankomakoma | F119      | 13961756    | 11407326                | 10889993              | 8392315                        |
| Ankomakoma | F126      | 11362500    | 9940250                 | 9477176               | 7323835                        |
| Ankomakoma | F129      | 16606000    | 14596350                | 13905707              | 10379141                       |
| Ankomakoma | F132      | 14491200    | 12659586                | 12098730              | 9206957                        |



|            |      |          |          |          |          |
|------------|------|----------|----------|----------|----------|
| Ankomakoma | F157 | 10015268 | 8563018  | 8150602  | 6580566  |
| Ankomakoma | F165 | 12379618 | 10804546 | 10269556 | 7871948  |
| Ankomakoma | F166 | 12478288 | 10948304 | 10416323 | 7951320  |
| Ankomakoma | F169 | 12572186 | 11077374 | 10523370 | 8098503  |
| Ankomakoma | M101 | 13423526 | 11783214 | 11238384 | 8587234  |
| Ankomakoma | M102 | 12391962 | 10874142 | 10345348 | 7919043  |
| Ankomakoma | M120 | 8788492  | 7357852  | 6977728  | 6167652  |
| Ankomakoma | M121 | 12935332 | 11216794 | 10707218 | 8238080  |
| Ankomakoma | M127 | 17003312 | 14836462 | 14131162 | 10487904 |
| Ankomakoma | M130 | 7593208  | 6352198  | 6005767  | 5314352  |
| Ankomakoma | M135 | 15682380 | 13802594 | 13136834 | 9819884  |
| Ankomakoma | M138 | 16178616 | 14210212 | 13501541 | 10100636 |
| Ankomakoma | M140 | 8369782  | 7419560  | 7040799  | 5478473  |
| Ankomakoma | M141 | 15740714 | 13779016 | 13112996 | 9814927  |
| Ankomakoma | M154 | 9530816  | 8278512  | 7887631  | 6407310  |
| Ankomakoma | M158 | 11404824 | 10008818 | 9504542  | 7290555  |
| Ankomakoma | M159 | 13226040 | 11641646 | 11062503 | 8412749  |
| Ankomakoma | M161 | 15064372 | 13240982 | 12589968 | 9469711  |
| Ankomakoma | M163 | 7814650  | 6792216  | 6482997  | 5305447  |

---

## Supplementary references

1. Nei M. Estimation of average heterozygosity and genetic distance from a small number of individuals. *Genetics*. 1978;89:583–90.
2. Excoffier L, Lischer HEL. Arlequin suite ver 3.5: a new series of programs to perform population genetics analyses under Linux and Windows. *Mol Ecol Resour*. 2010;10:564–7.
3. Lischer HEL, Excoffier L. PGDSpider: an automated data conversion tool for connecting population genetics and genomics programs. *Bioinformatics*. 2012;28:298–9.
4. Fredsted T, Pertoldi C, Schierup MH, Kappeler PM. Microsatellite analyses reveal fine-scale genetic structure in grey mouse lemurs (*Microcebus murinus*). *Mol Ecol*. 2005;14:2363–72.
5. Olivieri GL, Sousa V, Chikhi L, Radespiel U. From genetic diversity and structure to conservation: Genetic signature of recent population declines in three mouse lemur species (*Microcebus spp.*). *Biol Conserv*. 2008;141:1257–71.
6. Radespiel U, Schulte J, Burke RJ, Lehman SM. Molecular edge effects in the Endangered golden-brown mouse lemur *Microcebus ravelobensis*. *Oryx*. 2019;53:716–26.
7. Luo Z, Zhou S, Yu W, Yu H, Yang J, Tian Y, et al. Impacts of climate change on the distribution of Sichuan snub-nosed monkeys (*Rhinopithecus roxellana*) in Shennongjia area, China. *Am J Primatol*. 2015;77:135–51.
8. Biesack EE. Population Structure of Lethrinus Lentjan (*Lethrinidae, Percoidae*) Across the South China Sea and the Philippines Is Detected With Lane- Affected RADSeq Data. 2017.
9. Bagley RK, Sousa VC, Niemiller ML, Linnen CR. History, geography and host use shape genomewide patterns of genetic variation in the redheaded pine sawfly (*Neodiprion lecontei*). *Mol Ecol*. 2017;26:1022–44.
10. Garg KM, Chattopadhyay B, Koane B, Sam K, Rheindt FE. Last Glacial Maximum led to community-wide population expansion in a montane songbird radiation in highland Papua New Guinea. *BMC Evol Biol*. 2020;20:82.
11. Aleixo-Pais I, Salmons J, Sgarlata GM, Rakotonanahary A, Sousa AP, Parreira B, et al. The genetic structure of a mouse lemur living in a fragmented habitat in Northern Madagascar. *Conserv Genet*. 2019;20:229–43. doi:10.1007/s10592-018-1126-z.
12. Evanno G, Regnaut S, Goudet J. Detecting the number of clusters of individuals using the software STRUCTURE: A simulation study. *Mol Ecol*. 2005;14:2611–20.
13. Google Earth [online]. Ankaranfantsika National Park, Madagascar. DigitalGlobe 2012. <https://earth.google.com/web/>. Accessed 26 Apr 2021.
14. Vieira FG, Fumagalli M, Albrechtsen A, Nielsen R. Estimating inbreeding coefficients from NGS data: Impact on genotype calling and allele frequency estimation. *Genome Res*. 2013;23:1852–61.
